# Supplementary material for: Simulation Validation of an 8-Channel Parallel-Transmit Dipole Array on an Infant Phantom: Including RF Losses for Robust Correlation with Experimental Results
Source: Sensors (Basel). 2024 Apr 1;24(7):2254. doi: 10.3390/s24072254 (PMC11014297; doi:10.3390/s24072254)
Supplement: Supplementary file 1 [file sensors-24-02254-s001.zip › sensors-2898130-supplementary.pdf]

*Supplementary Table S1 - Capacitor value (C2) for the built and simulated 8TxRx dipole coil array. Configurations 1 and 2 are given.*

| Capacitor C2 (pF) | Built coil | Configuration 1 | Configuration 2 |
|-------------------|------------|-----------------|-----------------|
| Dipole 1          | 18         | 18              | 18              |
| Dipole 2          | 18         | 18              | 18.1            |
| Dipole 3          | 20         | 25              | 24.9            |
| Dipole 4          | 18         | 18.2            | 18.1            |
| Dipole 5          | 20         | 24.9            | 25              |
| Dipole 6          | 20         | 24.9            | 18              |
| Dipole 7          | 20         | 22.6            | 18.1            |
| Dipole 8          | 20         | 22.5            | 23.9            |

*Supplementary Table S2 - Resistors values for the simulated 8TxRx dipole coil array in configuration 1*

| Resistors (Ohms) | R1   | R2   |
|------------------|------|------|
| Dipole 1         | 3    | 2.89 |
| Dipole 2         | 2    | 2    |
| Dipole 3         | 3    | 3    |
| Dipole 4         | 0.20 | 1.06 |
| Dipole 5         | 4.5  | 4.5  |
| Dipole 6         | 0.63 | 2.89 |
| Dipole 7         | 3.49 | 3.4  |
| Dipole 8         | 3    | 2.99 |

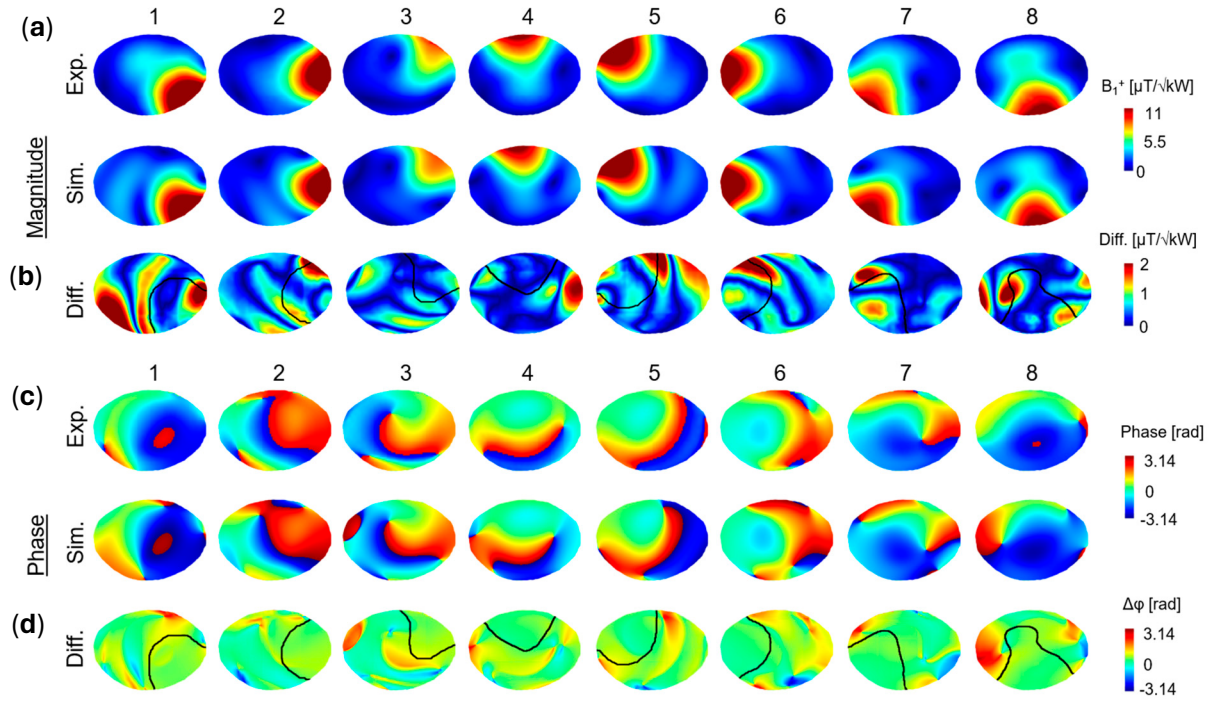

**Supplementary Figure S1.** In configuration 2 - (a) Experimental and simulated  $B_1^+$ -field maps, normalized to 1kW total input power, shown for individual dipoles. (c) Experimental and simulated individual phase maps, computed relative to the shimmed mode. (b) and (d) Difference maps calculated for the individual  $B_1^+$ -field maps with different scale than (a). In (b) and (d) a contour line was drawn (in black) to represent the experimental individual  $B_1^+$ -field distribution patterns.
